# Supplementary material for: Endocrine activities of phthalate alternatives; assessing the safety profile of furan dicarboxylic acid esters using a panel of human cell based reporter gene assays
Source: Royal Society of Chemistry journal article supplement (doi:10.1039/c9gc04348a), 2020-01-01
Supplement: c9gc04348a1.pdf [file c9gc04348a1.pdf]

## Endocrine activities of phthalate alternatives; assessing the safety profile of furan dicarboxylic acid esters using a panel of human cell based reporter gene assays

Barbara M. A. van Vugt-Lussenburg,<sup>\*a</sup> Daan S. van Es,<sup>\*b</sup> Matthijs Naderman,<sup>a</sup> Jerome le Notre,<sup>b</sup> Frits van der Klis,<sup>b</sup> Abraham Brouwer,<sup>a,c</sup> and Bart van der Burg<sup>b</sup>

<sup>a</sup> BioDetection Systems bv, Science Park 406, 1098XH Amsterdam.

<sup>b</sup> Wageningen Food and Biobased Research (WFBR), Bornse Weilanden 9, 6708WG, Wageningen, The Netherlands.

<sup>c</sup> VU University, Department of Animal Ecology, Amsterdam, the Netherlands.

### Electronic Supporting Information

#### Selection of Chemicals

The chemicals selected for this study are shown in ESI table 1. The selection was based on several criteria, such as:

Expected toxicological effects (e.g. for known endocrine disrupting substances (EDC) like bisphenols and certain ortho-phthalate esters); Isomerism, in order to investigate the effect of positional isomers; Synthetic accessibility (can the substance be synthesised in required purity with acceptable effort); Commercial availability; where possible commercial materials were used.

ESI Table 1: all substances selected for the current study

| CAS no    | Name                         | Abbreviation | Reason for inclusion                                                                                                               |
|-----------|------------------------------|--------------|------------------------------------------------------------------------------------------------------------------------------------|
| 620-92-8  | Bisphenol F                  | BPF          | Assay selection: known EDC                                                                                                         |
| 80-05-7   | Bisphenol A                  | BPA          | Assay selection: known EDC                                                                                                         |
| 140-66-9  | 4-tert-octylphenol           | 4-t-OP       | Assay selection: known EDC                                                                                                         |
| 104-40-5  | 4-Nonylphenol                | 4-NP         | Assay selection: known EDC                                                                                                         |
|           |                              |              |                                                                                                                                    |
| 4376-18-5 | Monomethyl phthalate         | MMP          | Reference: Potential DMP metabolite                                                                                                |
| 131-70-4  | Monobutyl phthalate          | MBP          | Reference: Potential BBP metabolite                                                                                                |
| 2528-16-7 | Monobenzyl phthalate         | MBzP         | Reference: Potential BBP metabolite                                                                                                |
| 4376-20-9 | Mono(2-ethylhexyl) phthalate | MEHP         | Reference: known EDC; DEHP metabolite                                                                                              |
|           |                              |              |                                                                                                                                    |
| 131-11-3  | Dimethyl phthalate           | DMP          | Reference. Was used as solvent Comparison set diMe esters                                                                          |
| 1459-93-4 | Dimethyl isophthalate        | DMIP         | Reference Monomer/feedstock for polyesters (PETI), resins and plasticisers<br>Comparison set diMe esters                           |
| 120-61-6  | Dimethyl terephthalate       | DMT          | Reference: Monomer/feedstock for polyesters like PET and for TA plasticisers (occupational exposure)<br>Comparison set diMe esters |
| 84-66-2   | Diethyl phthalate            | DEP          | Reference; short chain phthalate diester<br>Comparison set diEt esters                                                             |
| 636-53-3  | Diethyl isophthalate         | DEIP         | Reference; short chain phthalate diester<br>Comparison set diEt esters                                                             |
| 636-09-9  | Diethyl terephthalate        | DET          | Reference; short chain phthalate diester<br>Comparison set diEt esters                                                             |
| 84-74-2   | Di(n-butyl) phthalate        | DBP          | Reference phthalate: short chain phthalates are known for tox effects/ endocrine disruptors                                        |
| 84-69-5   | Diisobutyl phthalate         | DIBP         | Reference phthalate: short chain phthalates are known for tox effects/ endocrine disruptors<br>Comparison set di-iBut esters       |
| 85-68-7   | Butylbenzyl phthalate        | BBP          | Reference phthalate: short chain phthalates are known for tox effects/ endocrine disruptors                                        |

|             |                                         |           |                                                                                                                                                                                                                                               |
|-------------|-----------------------------------------|-----------|-----------------------------------------------------------------------------------------------------------------------------------------------------------------------------------------------------------------------------------------------|
| 84-61-7     | Dicyclohexyl phthalate                  | DCP       | Reference phthalate: short chain phthalates are known for tox effects/ endocrine disruptors                                                                                                                                                   |
| 84-75-3     | Di(n-hexyl) phthalate                   | DHP       | Reference phthalate: short chain phthalates are known for tox effects/ endocrine disruptors                                                                                                                                                   |
| 117-84-0    | Di(n-octyl) phthalate                   | DOP       | Reference phthalate: isomer of DEHP; shows effects of linear alcohols                                                                                                                                                                         |
| 117-81-7    | Di(2-ethylhexyl) phthalate              | DEHP      | Reference phthalate: primary industrial benchmark. Comparison set diEtHex esters                                                                                                                                                              |
| 137-89-3    | Di(2-ethylhexyl) isophthalate           | DEHIP     | Reference phthalate: used to study isomer effects. Comparison set diEtHex esters                                                                                                                                                              |
| 6422-86-2   | Di(2-ethylhexyl) terephthalate          | DEHT      | Reference phthalate: commercialised as 'non-phthalate' plasticiser. Comparison set diEtHex esters                                                                                                                                             |
| 28553-12-0  | Diisononyl phthalate                    | DINP      | Reference phthalate: industrial benchmark; long chain derivative, alternative to DEHP                                                                                                                                                         |
| 26761-40-0  | Diisodecyl phthalate                    | DIDP      | Reference phthalate: industrial benchmark; long chain derivative, alternative to DEHP. Comparison set di-iDec esters                                                                                                                          |
| 4282-33-1   | Dimethyl-3,4-Furandicarboxylic acid     | DM-34FDCA | Test substance; for isomer comparison. Comparison set diMe esters                                                                                                                                                                             |
| 4282-32-0   | Dimethyl-2,5-Furandicarboxylic acid     | DM-25FDCA | Test substance; Monomer/feedstock for polyesters like PET and for FDCA plasticisers (occupational exposure). Comparison set diMe esters                                                                                                       |
| 1710-13-0   | Dimethyl-2,4-Furandicarboxylic acid     | DM-24FDCA | Test substance; for isomer comparison. Comparison set diMe esters                                                                                                                                                                             |
| 53662-83-2  | Diethyl-2,5-furandicarboxylate          | DEF       | Test substance; potential monomer/feedstock for polyesters like PET and for FDCA plasticisers (occupational exposure). Comparison set diEt esters                                                                                             |
| -           | Di(isobutyl)furan-2,5-dicarboxylate     | DIBF      | Test substance; solid substance; interesting for tox effect comparison to short chain phthalates of the butyl series. Comparison set di-iBut esters                                                                                           |
| 158099-01-5 | Di(2-ethylhexyl)furan-2,5-dicarboxylate | DEHF      | Test substance; plasticising performance similarity to 2-EH phthalates; possible functional alternative to DEHP/DEHT. Comparison set diEtHex esters                                                                                           |
| -           | Di(isodecyl)furan-2,5-dicarboxylate     | DIDF      | Test substance; possible functional alternative to DIDP. Comparison set di-iDec esters                                                                                                                                                        |
| 88-99-3     | Phthalic acid                           | PA        | Reference. Fully hydrolysed diacid, expected intermediate hydrophilic metabolite; isomer effect; Monomer for resins. Comparison set free acids                                                                                                |
| 121-91-5    | Isophthalic acid                        | IPA       | Reference. Fully hydrolysed diacid, expected intermediate hydrophilic metabolite; isomer effect Monomer/feedstock for polyesters (PETI), resins and plasticisers. Comparison set free acids                                                   |
| 100-21-0    | Terephthalic acid                       | TA        | Reference. Fully hydrolysed diacid, expected intermediate hydrophilic metabolite (monoesters are also hydrolysis metabolites, yet more lipophilic) Monomer for PET and for TA plasticisers (occupational exposure). Comparison set free acids |
| 3387-26-6   | 3,4-Furandicarboxylic acid              | 34FDCA    | Test substance; Fully hydrolysed diacid, expected intermediate hydrophilic metabolite; isomer effect Comparison set free acids                                                                                                                |
| 3238-40-2   | 2,5-Furandicarboxylic acid              | 25FDCA    | Test substance; Fully hydrolysed diacid, expected intermediate hydrophilic metabolite; main target substance<br>Monomer/feedstock for polyesters like PEF and for FDCA plasticisers (occupational exposure). Comparison set free acids        |
| 4282-28-4   | 2,4-Furandicarboxylic acid              | 24FDCA    | Test substance; Fully hydrolysed diacid, expected intermediate hydrophilic metabolite; isomer effect. Comparison set free acids                                                                                                               |

## Synthesis of derivatives

All chemicals were used as received from commercial chemical suppliers (e.g. Sigma Aldrich, VWR, etc). 2,5-FDCA for diester synthesis, was a gift from Archer Daniels Midland (ADM). Exxal 10®, isodecanol isomeric mixture, was a gift from Exxon-Mobil.

GC-MS analysis was performed on an Interscience Trace GC Ultra GC with AS3000 II auto sampler (He carrier gas, flow 1mL/min, split flow 20 mL/min; Restek GC column Rxi-5ms 30 30 m x 0.25 mm x 0.25 µm; GC program: hold 3 min at 50 °C, ramp 7.5 °C/min, final temperature 330 °C) connected to an Interscience Trace DSQ II XL quadrupole mass selective detector (EI, mass range 35-500 Dalton, 150 ms sample speed).

Nuclear magnetic resonance (NMR) spectra were recorded on a Bruker Avance III spectrometer operating at 400.17 MHz (1H) and 100.62 MHz (13C).

Differential Scanning Calorimetry (DSC) was performed on a Perkin Elmer Diamond series DSC. The temperature range used was -90 °C up to 20 °C at a heating rate of 10 °C/min after holding at -90 °C for 1 minute.

Melting points were measured using a Mettler Toledo MP80 Melting Point System.

### Di(2-methylpropyl)furan-2,5-dicarboxylate (DIBF) synthesis **method 1**.

In a 1 L round-bottom flask, under a positive pressure of nitrogen, and strong magnetic stirring, were introduced the substrate 2,5-FDCA (100.0 g, 0.64 mol), 2-methyl-1-propanol (236 mL, 2.56 mol) and methanesulfonic acid (MSA, 1.0 mL, 2.5 mol%). Additional 2-methyl-1-propanol (20 mL) was placed in the Dean-Stark trap and the white slurry was heated at 130 °C. After 24 h, 23 mL of water was collected in the Dean-Stark trap (theoretical 23 mL). After reaction, a clear slightly brown crude solution was obtained. During cooling down to room temperature a white solid crystallized in the flask. The solid was filtered over a Büchner funnel, washed with ethanol, and dried under vacuum to afford the product (109.7 g, 71% yield) as a white solid.

<sup>1</sup>H NMR (400.2 MHz, RT, CDCl<sub>3</sub>): δ = 7.18 (s, 2H), 4.10 (d, 4H, J = 6.7 Hz), 2.06 (nontuplet, 2H, J = 6.7 Hz), 0.98 (d, 12H, J = 6.7 Hz); <sup>13</sup>C NMR (100.6 MHz, RT, CDCl<sub>3</sub>): δ = 158.1, 146.9, 118.1, 71.3, 27.8, 19.0; MS (EI): m/z (%) = 268 ([M]<sup>+</sup>, <1), 213 (13), 196 (5), 195 (45), 158 (6), 156 (100), 140 (9), 139 (93), 95 (9), 94 (7), 66 (7), 57 (26), 56 (43), 41 (18), 39 (8). m.p.: 88-89 °C.

### Di(2-ethylhexyl)furan-2,5-dicarboxylate (DEHF) synthesis **method 1**

In a 1 L round-bottom flask, under a positive pressure of nitrogen, and strong magnetic stirring, were introduced the substrate 2,5-FDCA (82.8 g, 0.53 mol), 2-ethylhexanol (250 mL, 1.59 mol) and methanesulfonic acid (MSA, 0.9, 2.5 mol%). Additional 2-ethylhexanol (20 mL) was placed in the Dean-Stark trap and the white slurry was heated at 160 °C. After 10 h, 19 mL of water was collected in the Dean-Stark trap (theoretical 19 mL). Excess 2-ethylhexanol was removed under reduced pressure (high vacuum and heating) to afford a light brown crude. The crude product was purified by flash

chromatography over silica gel (elution: ether/petroleum ether = 1/9,  $R_f$  = 0.5) giving the product (133.9 g, 66% yield) as a pale yellow oil.

$^1\text{H}$  NMR (400.2 MHz, RT,  $\text{CDCl}_3$ ):  $\delta$  = 7.15 (s, 2H), 4.10 (ddd, 4H,  $J$  = 15.6, 9.7, 3.5 Hz), 1.68 (heptuplet, 2H,  $J$  = 6.1 Hz), 1.42-1.26 (m, 16H), 0.92-0.85 (m, 12H);  $^{13}\text{C}$  NMR (100.6 MHz, RT,  $\text{CDCl}_3$ ):  $\delta$  = 158.1, 146.9, 118.0, 67.8, 38.8, 30.3, 28.8, 23.7, 22.8, 13.9, 10.9; MS (EI):  $m/z$  (%) = 380 ( $[\text{M}]^+$ , <1), 269 (9), 251 (9), 157 (100), 140 (11), 139 (87), 113 (33), 112 (58), 95 (9), 94 (7), 84 (24), 83 (41), 82 (10), 71 (37), 70 (90), 69 (22), 57 (49), 56 (18), 55 (35), 43 (20), 41 (28).

#### Di(2-ethylhexyl)furan-2,5-dicarboxylate (DEHF) synthesis **method 2**

A 2 L 3-neck round-bottom flask was placed in a heating mantle and equipped with a mechanical stirrer, a Dean-Stark trap with reflux condenser, a temperature controller and an  $\text{N}_2$ -inlet. The flask was charged with 2,5-FDCA (189.4 g, 1.21 mol, ADM), 2-ethylhexanol (632 g, 4.85 mol, >99.6 %, Aldrich) and methanesulfonic acid (MSA, 2.91 g, 0.03 mol, anhydrous, Aldrich). The resulting white suspension was heated to 160 °C under stirring (500 rpm), while a stream of nitrogen was bubbled through the reaction mixture. At 130 °C, water formation started, as was observed in the Dean-Stark trap. After 9 h (including additional MSA addition), > 80% of the theoretical amount of water was obtained, and the reaction mixture was allowed to cool down to RT.

The resulting suspension was filtered over a type-3 glass filter, giving a slightly yellow clear solution, which was washed with sat.  $\text{NaHCO}_3$ -solution (1 L) to remove MSA. The resulting hazy organic phase was washed twice with brine to give a clear organic phase. The organic layer was subsequently dried over  $\text{MgSO}_4$  and filtered over a type-3 glass filter to give a clear, slightly yellow solution. Decoloration was achieved using activated carbon (20 g) for 1 h at RT. After filtration over Celite, a slightly yellow clear liquid product was obtained.

Next, excess 2-ethylhexanol was removed under reduced pressure (0.5 mbar, 140 °C) giving the product (343 g, 74% yield) as a yellow liquid.

NMR and GC-MS analyses same as for method 1.

#### Di(isodecyl)furan-2,5-dicarboxylate (DIDF) synthesis **method 1.**

In a 1 L round-bottom flask, under a positive pressure of nitrogen, and strong magnetic stirring, were introduced the substrate 2,5-FDCA (67.9 g, 0.44 mol), isodecanol (256 mL, 1.31 mol), *o*-xylene (200 mL) and methanesulfonic acid (MSA, 0.7, 2.5 mol%). Additional isodecanol (20 mL) was placed in the Dean-Stark trap and the white slurry was heated at 175 °C. After 12 h, 7 mL of water was collected in the Dean-Stark trap (theoretical 16 mL). The reaction mixture was subsequently cooled down to room temperature, and another 0.7 mL of MSA was added and heating was resumed at 185 °C for 6 h (the collected water volume reached 11.6 mL). Next, excess isodecanol was removed under reduced pressure (high vacuum and heating) to afford a light brown crude. The crude product was purified by flash chromatography over silica gel (elution: ether/petroleum ether = 1/9,  $R_f$  = 0.35) giving the product (124.1 g, 65% yield) as a pale yellow oil.

Since Exxal 10® is a complex mixture of C9, C10, C11 alcohols, the proton and carbon NMR spectra of the isolated product are too complicated to be described in detail. MS (EI):  $m/z$  (%) = 437 ( $[\text{M}]^+$ , <1),

297 (14), 157 (41), 141 (59), 140 (46), 139 (52), 112 (65), 111 (39), 99 (22), 98 (31), 97 (50), 85 (77), 84 (53), 83 (81), 71 (86), 70 (69), 57 (96), 56 (31), 55 (92), 43 (66), 41 (43).

#### Di(2-ethylhexyl) phthalate (DEHP) synthesis **method 2.**

A 2 L 3-neck round-bottom flask was placed in a heating mantle and equipped with a mechanical stirrer, a Dean-Stark trap with reflux condenser, a temperature controller and an N<sub>2</sub>-inlet. The flask was charged with phthalic acid (244 g, 1.47 mol, ACS reagent, >99.5%, Sigma Aldrich), 2-ethylhexanol (765.1 g, 5.87 mol, >99.6 %, Aldrich) and methanesulfonic acid (MSA, 3.53 g, 0.037 mol, anhydrous, Sigma Aldrich). The resulting white suspension was heated to 140 °C under stirring (300 rpm), while a stream of nitrogen gas was bubbled through the reaction mixture. At 120 °C water formation started, as was observed in the Dean-Stark trap, and at 140 °C the mixture started to reflux. After 20 min. at 140 °C, the reaction mixture turned from a white suspension into a clear light yellow solution. After 80 min., the temperature was increased to 150 °C. After 6 h, the theoretical amount of water (52.9 g) was obtained, and the reaction mixture was allowed to cool down to RT.

The resulting slightly yellow clear solution was washed with sat. NaHCO<sub>3</sub>-solution (1 L) to remove MSA. The resulting hazy organic phase was washed twice with brine to give a clear organic phase. The organic layer was subsequently dried over MgSO<sub>4</sub> and filtered over a type-3 glass filter to give a clear, slightly yellow solution. Decoloration was achieved using activated carbon (25 g) for 1 h at RT. After filtration over Celite, a slightly yellow clear liquid product was obtained.

Next, excess 2-ethylhexanol was removed under reduced pressure (0.5 mbar, 140 °C) giving the product as a pale yellow (100 Hazen, Dr. Lange LICO 100 universal colorimeter) liquid.

NMR and GC-MS analyses confirmed DEHP, with over 98% purity.

2,4-FDCA and its dimethyl ester were prepared according to ref <sup>1</sup>.



ESI Table 2: All CALUX data; left the selected assays, right the non-selected non-responsive assays. Results are presented as lowest effect concentrations (LEC) in LogM. - = no activity observed; X = Not Assessed.

| Entry Number | CAS       | substance                    | Cytotox | ERα   | AR-anti | PR-anti | GR-anti | TRβ-anti | PPARα | PPARγ | AhR   | AP1  | ESRE | Nrf2 | p53 GENTOX |  | ERα-anti | AR | PR | GR | TRβ | RAR | LXR | PAH | Hif1α | TCF | NFκB | p21 |
|--------------|-----------|------------------------------|---------|-------|---------|---------|---------|----------|-------|-------|-------|------|------|------|------------|--|----------|----|----|----|-----|-----|-----|-----|-------|-----|------|-----|
| 1            |           | Reference substance          | -6.6    | -12.2 | -7.7    | -11.0   | -9.5    | -6.9     | -9.7  | -7.7  | -12.3 | -9.5 | -7.5 | -5.4 | -9         |  |          |    |    |    |     |     |     |     |       |     |      |     |
| 2            | 620-92-8  | Bisphenol F                  | -       | -6.6  | -5.4    | -4.8    | -       | X        | -     | -     | -     | -    | -4.7 | -    | -3.3       |  | -        | -  | -  | -  | -   | -   | -   | -   | -     | -   | -    | -   |
| 3            | 80-05-7   | Bisphenol A                  | -4.0    | -7.7  | -6.8    | -5.5    | -4.5    | -4.2     | -     | -     | -     | -    | -4.3 | -    | X          |  | -        | -  | -  | -  | -   | X   | -   | -   | -     | -   | -    | -   |
| 4            | 140-66-9  | 4-tert-Octylphenol           | -5.5    | -7.2  | -6.0    | -6.1    | -       | -        | -     | -     | -     | -    | -    | -4.5 | -          |  | -        | -  | -  | -  | -   | -   | -   | X   | -     | -   | -    | -   |
| 5            | 104-40-5  | 4-Nonylphenol                | -4.9    | -5.1  | -5.8    | -5.5    | -       | -        | -     | -     | -     | -    | -4.6 | -    | X          |  | -        | -  | -  | -  | -   | -   | -   | -   | -     | -   | -    | -   |
|              |           |                              |         |       |         |         |         |          |       |       |       |      |      |      |            |  |          |    |    |    |     |     |     |     |       |     |      |     |
| 6            | 4376-18-5 | Monomethyl phthalate         | -       | -     | -       | -       | -       | X        | -     | -     | -     | -    | -    | -    | X          |  | -        | -  | -  | -  | -   | -   | -   | -   | -     | -   | X    | -   |
| 7            | 131-70-4  | Monobutyl phthalate          | -       | -     | -       | -       | -       | -        | -     | -     | -     | -    | -    | -    | -          |  | -        | -  | -  | -  | -   | -   | -   | -   | -     | -   | -    | -   |
| 8            | 2528-16-7 | Monobenzyl phthalate         | -       | -     | -       | -       | -       | -        | -     | -     | -     | -    | -    | -    | -          |  | -        | -  | -  | -  | -   | -   | -   | -   | -     | -   | -    | -   |
| 9            | 4376-20-9 | Mono(2-ethylhexyl) phthalate | -3.5    | -     | -       | -       | -       | -        | -5.5  | -4.7  | -     | -    | -    | -    | -3.2       |  | -        | -  | -  | -  | -   | -   | -   | -   | -     | -   | -    | -   |
| 10           | 131-11-3  | Dimethyl phthalate           | -       | -     | -4.7    | -3.6    | -       | -        | -     | -     | -     | -    | -    | -    | -          |  | X        | X  | X  | X  | X   | X   | X   | X   | X     | X   | X    | X   |
| 11           | 1459-93-4 | Dimethyl isophthalate        | -       | -3.3  | -3.1    | -       | -       | -        | -     | -     | -     | -    | -    | -    | -          |  | X        | X  | X  | X  | X   | X   | X   | X   | X     | X   | X    | X   |
| 12           | 120-61-6  | Dimethyl terephthalate       | -       | -     | -       | -       | -       | -        | -     | -     | -     | -    | -    | -    | -          |  | -        | -  | -  | -  | -   | -   | -   | -   | -     | -   | -    | -   |
| 13           | 84-66-2   | Diethyl phthalate            | -3.5    | -4.0  | -5.0    | -4.3    | -       | -        | -     | -     | -     | -    | -    | -    | -          |  | -        | -  | -  | -  | -   | -   | -   | -   | -     | -   | -    | -   |
| 14           | 636-53-3  | Diethyl isophthalate         | -       | -     | -       | -       | -       | -        | -     | -     | -     | -    | -    | -    | -          |  | X        | X  | X  | X  | X   | X   | X   | X   | X     | X   | X    | X   |
| 15           | 636-09-9  | Diethyl terephthalate        | -       | -     | -4.0    | -       | -       | -        | -     | -     | -     | -    | -    | -    | -          |  | X        | X  | X  | X  | X   | X   | X   | X   | X     | X   | X    | X   |
| 16           | 84-74-2   | Dibutyl phthalate            | -       | -5.2  | -4.7    | -4.5    | -       | -        | -     | -     | -     | -    | -    | -    | -          |  | -        | -  | -  | -  | -   | -   | -   | -   | -     | -   | -    | -   |
| 17           | 84-69-5   | Diisobutyl phthalate         | -4.5    | -5.3  | -5.0    | -5.0    | -       | -        | -     | -     | -     | -    | -    | -    | -          |  | -        | -  | -  | -  | -   | -   | -   | -   | -     | -   | -    | -   |
| 18           | 84-75-3   | Di(n-hexyl) phthalate        | -3.5    | -5.0  | -5.0    | -5.5    | -4.5    | X        | -     | -     | -4.0  | -4.2 | -    | -    | X          |  | -        | -  | -  | -  | -   | -   | -   | -   | -     | -   | -    | -   |

| Entry Number | CAS        | substance                                | Cytotox | ERα  | AR-anti | PR-anti | GR-anti | TRβ-anti | PPARα | PPARγ | Ahr  | AP1 | ESRE | Nrf2 | p53 GENTOX |  | ERα-anti | AR | PR | GR | TRβ | RAR | LXR | PAH | Hif1α | TCF | NFκB | p21 |
|--------------|------------|------------------------------------------|---------|------|---------|---------|---------|----------|-------|-------|------|-----|------|------|------------|--|----------|----|----|----|-----|-----|-----|-----|-------|-----|------|-----|
| 19           | 84-61-7    | Dicyclohexyl phthalate                   | -4.5    | -5.3 | -       | -5.4    | -5.1    | X        | -     | -     | NA   | X   | -    | -    | -          |  | -        | -  | -  | -  | -   | -   | -   | -   | -     | -   | -    |     |
| 20           | 85-68-7    | Butylbenzyl phthalate                    | -3.9    | -6.3 | -5.6    | -5.5    | -       | -        | -     | -4.5  | -3.7 | -   | -    | -    | -          |  | -        | -  | -  | -  | -   | -   | -   | -   | -     | -   | -    |     |
| 21           | 117-81-7   | Di(2-ethylhexyl) phthalate (synthesized) | -       | -3.9 | -       | -       | -       | -        | -     | -     | -    | -   | -    | -    | -          |  | -        | -  | -  | -  | -   | -   | X   | -   | -     | -   | -    |     |
| 22           | 117-81-7   | Di(2-ethylhexyl) phthalate (commercial)  | -       | -4.0 | -       | -       | -       | -        | -     | -     | -    | -   | -    | -    | -          |  | -        | -  | -  | -  | -   | -   | X   | -   | -     | -   | -    |     |
| 23           | 137-89-3   | Di(2-ethylhexyl) isophthalate            | -       | -    | -       | -       | -       | -        | -     | -     | -    | -   | -    | -    | -          |  | X        | X  | X  | X  | X   | X   | X   | X   | X     | X   | X    |     |
| 24           | 6422-86-2  | Di(2-ethylhexyl) terephthalate           | -       | -    | -       | -       | -       | -        | -     | -     | -    | -   | -    | -    | -          |  | X        | X  | X  | X  | X   | X   | X   | X   | X     | X   | X    |     |
| 25           | 117-84-0   | Dioctyl phthalate                        | -       | -    | -       | -       | -       | X        | -     | -     | -    | -   | -    | -    | -          |  | -        | -  | -  | -  | -   | -   | -   | -   | -     | -   | -    |     |
| 26           | 28553-12-0 | Diisononyl phthalate                     | -       | -    | -       | -       | -       | -        | -     | -     | -    | -   | -    | -    | -          |  | -        | -  | -  | -  | -   | -   | -   | -   | -     | -   | -    |     |
| 27           | 26761-40-0 | Diisodecyl phthalate                     | -       | -    | -       | -       | -       | -        | -     | -     | -    | -   | -    | -    | -          |  | -        | -  | -  | -  | -   | -   | -   | -   | -     | -   | -    |     |



ESI Table 3. CALUX assay panel results for di-substituted phthalates (bold) versus furans, arranged by order of increasing chain length. Results are presented as lowest effect concentrations (LogM). - = no activity observed up to 1E-3M. N/A: not applicable; DIBF and DIDF have not been CAS-registered.

| Entry Number | CAS         | substance                               | Abbreviation              | Cytotox | ERα  | AR-anti | PR-anti | GR-anti | TRβ-anti | PPARα | PPARγ | AR | AP1 | ESRE | Nrf2 | p53 GENTOX |
|--------------|-------------|-----------------------------------------|---------------------------|---------|------|---------|---------|---------|----------|-------|-------|----|-----|------|------|------------|
| 28           | 131-11-3    | <b>Dimethyl phthalate</b>               | <b>DMP</b>                | -       | -    | -4.7    | -3.6    | -       | -        | -     | -     | -  | -   | -    | -    | -          |
| 29           | 1459-93-4   | <b>Dimethyl isophthalate</b>            | <b>DMIP</b>               | -       | -3.3 | -3.1    | -       | -       | -        | -     | -     | -  | -   | -    | -    | -          |
| 30           | 120-61-6    | <b>Dimethyl terephthalate</b>           | <b>DMT</b>                | -       | -    | -       | -       | -       | -        | -     | -     | -  | -   | -    | -    | -          |
| 31           | 4282-33-1   | Dimethyl-3,4-furandicarboxylate         | DM-3,4-FDCA               | -       | -    | -       | -       | -       | -        | -     | -     | -  | -   | -    | -    | -          |
| 32           | 4282-32-0   | Dimethyl-2,5-furandicarboxylate         | DM-2,5-FDCA               | -       | -    | -       | -       | -       | -        | -     | -     | -  | -   | -    | -    | -          |
| 33           | 1710-13-0   | Dimethyl-2,4-furandicarboxylate         | DM-2,4-FDCA               | -       | -    | -       | -       | -       | -        | -     | -     | -  | -   | -    | -    | -          |
| 34           | 84-66-2     | <b>Diethyl phthalate</b>                | <b>DEP</b>                | -3.5    | -4.0 | -5.0    | -4.3    | -       | -        | -     | -     | -  | -   | -    | -    | -          |
| 35           | 636-53-3    | <b>Diethyl isophthalate</b>             | <b>DEIP</b>               | -       | -    | -       | -       | -       | -        | -     | -     | -  | -   | -    | -    | -          |
| 36           | 636-09-9    | <b>Diethyl terephthalate</b>            | <b>DET</b>                | -       | -    | -4.0    | -       | -       | -        | -     | -     | -  | -   | -    | -    | -          |
| 37           | 53662-83-2  | Diethyl-2,5-furandicarboxylate          | DEF                       | -       | -    | -       | -       | -       | -        | -     | -     | -  | -   | -    | -    | -          |
| 38           | 84-69-5     | <b>Diisobutyl phthalate</b>             | <b>DIBP</b>               | -4.5    | -5.3 | -5.0    | -5.0    | -       | -        | -     | -     | -  | -   | -    | -    | -          |
| 39           | N/A         | Diisobutyl-2,5-furandicarboxylate       | DIBF                      | -       | -4.3 | -       | -       | -       | -        | -     | -     | -  | -   | -    | -    | -          |
| 40           | 117-81-7    | <b>Di(2-ethylhexyl) phthalate</b>       | <b>DEHP (synthesized)</b> | -       | -3.9 | -       | -       | -       | -        | -     | -     | -  | -   | -    | -    | -          |
| 41           | 117-81-7    | <b>Di(2-ethylhexyl) phthalate</b>       | <b>DEHP (commercial)</b>  | -       | -4.0 | -       | -       | -       | -        | -     | -     | -  | -   | -    | -    | -          |
| 42           | 137-89-3    | <b>Di(2-ethylhexyl) isophthalate</b>    | <b>DEHIP</b>              | -       | -    | -       | -       | -       | -        | -     | -     | -  | -   | -    | -    | -          |
| 43           | 6422-86-2   | <b>Di(2-ethylhexyl) terephthalate</b>   | <b>DEHT</b>               | -       | -    | -       | -       | -       | -        | -     | -     | -  | -   | -    | -    | -          |
| 44           | 158099-01-5 | Di(2-ethylhexyl)-2,5-furandicarboxylate | DEHF (method 1)           | -       | -    | -       | -       | -       | -        | -     | -     | -  | -   | -    | -    | -          |
| 45           | 158099-01-5 | Di(2-ethylhexyl)-2,5-furandicarboxylate | DEHF (method 2)           | -       | -    | -       | -       | -       | -        | -     | -     | -  | -   | -    | -    | -          |
| 46           | 26761-40-0  | <b>Diisodecyl phthalate</b>             | <b>DIDP</b>               | -       | -    | -       | -       | -       | -        | -     | -     | -  | -   | -    | -    | -          |
| 47           | N/A         | Diisodecylfuran-2,5-dicarboxylate       | DIDF                      | -       | -    | -       | -       | -       | -        | -     | -     | -  | -   | -    | -    | -          |
| 48           | 100-21-0    | <b>Terephthalic acid</b>                | <b>TA</b>                 | -       | -    | -       | -       | -       | -        | -     | -     | -  | -   | -    | -    | -          |
| 49           | 88-99-3     | <b>Phthalic acid</b>                    | <b>PA</b>                 | -       | -    | -       | -       | -       | -        | -     | -     | -  | -   | -    | -    | -          |
| 50           | 121-91-5    | <b>Isophthalic acid</b>                 | <b>IPA</b>                | -       | -    | -       | -       | -       | -        | -     | -     | -  | -   | -    | -    | -          |
| 51           | 4282-28-4   | 2,4-Furandicarboxylic acid              | 2,4-FDCA                  | -       | -    | -       | -       | -       | -        | -     | -     | -  | -   | -    | -    | -          |
| 52           | 3238-40-2   | 2,5-Furandicarboxylic acid              | 2,5-FDCA                  | -       | -    | -       | -       | -       | -        | -     | -     | -  | -   | -    | -    | -          |
| 53           | 3387-26-6   | 3,4-Furandicarboxylic acid              | 3,4-FDCA                  | -       | -    | -       | -       | -       | -        | -     | -     | -  | -   | -    | -    | -          |

ESI table 4: overview of literature values for solubilities of ortho-phthalate esters at 20-22°C; bold substances are part of this study.

| Phthalate   |                  | molecular weight | solubility ( $\mu\text{g L}^{-1}$ )                            | Solubility (M)                                                       | logM                    |
|-------------|------------------|------------------|----------------------------------------------------------------|----------------------------------------------------------------------|-------------------------|
| <b>DMP</b>  | dimethyl         | 194.2            | $4.2 \cdot 10^6$ <sup>2</sup>                                  | $2.16 \cdot 10^{-2}$                                                 | -1.66                   |
| <b>DEP</b>  | diethyl          | 222.2            | $1.1 \cdot 10^6$ <sup>2</sup><br>$9.4 \cdot 10^5$ <sup>3</sup> | $4.95 \cdot 10^{-3}$<br>$4.23 \cdot 10^{-3}$                         | -2.31<br>-2.37          |
| <b>DBP</b>  | Di(n-butyl)      | 278.4            | $1.1 \cdot 10^4$ <sup>2</sup><br>$1.5 \cdot 10^4$ <sup>3</sup> | $3.95 \cdot 10^{-5}$<br>$5.39 \cdot 10^{-5}$                         | -4.40<br>-4.27          |
| <b>DIBP</b> | diisobutyl       | 278.4            | $2.0 \cdot 10^4$ <sup>2</sup>                                  | $7.18 \cdot 10^{-5}$                                                 | -4.14                   |
| <b>BBP</b>  | butylbenzyl      | 312.4            | $2.7 \cdot 10^3$ <sup>2</sup>                                  | $8.64 \cdot 10^{-6}$                                                 | -5.06                   |
| <b>DHP</b>  | Di(n-hexyl)      | 334.4            | $520$ <sup>3</sup><br>$70$ <sup>4</sup><br>$50$ <sup>2,5</sup> | $1.56 \cdot 10^{-6}$<br>$2.09 \cdot 10^{-7}$<br>$1.50 \cdot 10^{-7}$ | -5.81<br>-6.68<br>-6.83 |
| <b>DOP</b>  | Di(n-octyl)      | 390.6            | $0.5$ <sup>2,5</sup><br>$0.4$ <sup>4</sup>                     | $1.28 \cdot 10^{-9}$<br>$1.02 \cdot 10^{-9}$                         | -8.89<br>-8.99          |
| <b>DEHP</b> | di(2-ethylhexyl) | 390.6            | $17$ <sup>3</sup><br>$3$ <sup>2</sup><br>$1.9$ <sup>4</sup>    | $4.35 \cdot 10^{-8}$<br>$7.68 \cdot 10^{-9}$<br>$4.86 \cdot 10^{-9}$ | -7.36<br>-8.11<br>-8.31 |
| DNP         | Di(n-nonyl)      | 418.6            | $0.13$ <sup>4</sup>                                            | $3.11 \cdot 10^{-10}$                                                | -9.51                   |
| <b>DINP</b> | diisononyl       | 418.6            | $< 1$ <sup>2</sup><br>$0.61$ <sup>4</sup>                      | $1.46 \cdot 10^{-9}$                                                 | -8.84                   |
| DDP         | Di(n-decyl)      | 446.6            | $0.2$ <sup>5</sup><br>$0.05$ <sup>4</sup>                      | $4.48 \cdot 10^{-10}$<br>$1.12 \cdot 10^{-10}$                       | -9.35<br>-9.95          |
| <b>DIDP</b> | diisodecyl       | 446.6            | $< 1$ <sup>2</sup><br>$0.17$ <sup>4</sup>                      | $9.81 \cdot 10^{-10}$                                                | -9.42                   |

Note that there is an inverse relationship between phthalate solubility and temperature; e.g. for DBP solubility drops from 14.6 mg/L at 25°C to 5.5 mg/L at 35°C; while cell assays are performed at an incubation temperature of 37°C<sup>3</sup>.

## References

1. S. Thiyagarajan, A. Pukin, J. van Haveren, M. Lutz and D. S. van Es, *RSC Advances*, 2013, **3**, 15678-15686.
2. C. A. Staples, D. R. Peterson, T. F. Parkerton and W. F. Adams, *Chemosphere*, 1997, **35**, 667-749.
3. M. Thomsen, L. Carlsen and S. Hvidt, *Environmental Toxicology and Chemistry*, 2001, **20**, 127-132.
4. D. J. Letinski, M. J. Connelly, D. R. Peterson and T. F. Parkerton, *Chemosphere*, 2002, **48**, 257-265.
5. J. J. Ellington, *J. Chem. Eng. Data*, 1999, **44**, 1414-1418.
